# Supplementary material
Source: Springer Nature journal article supplement (https://www.springermedizin.de/resource/supplementary/12913_2012_3136_MOESM2_ESM.pdf/9532410)

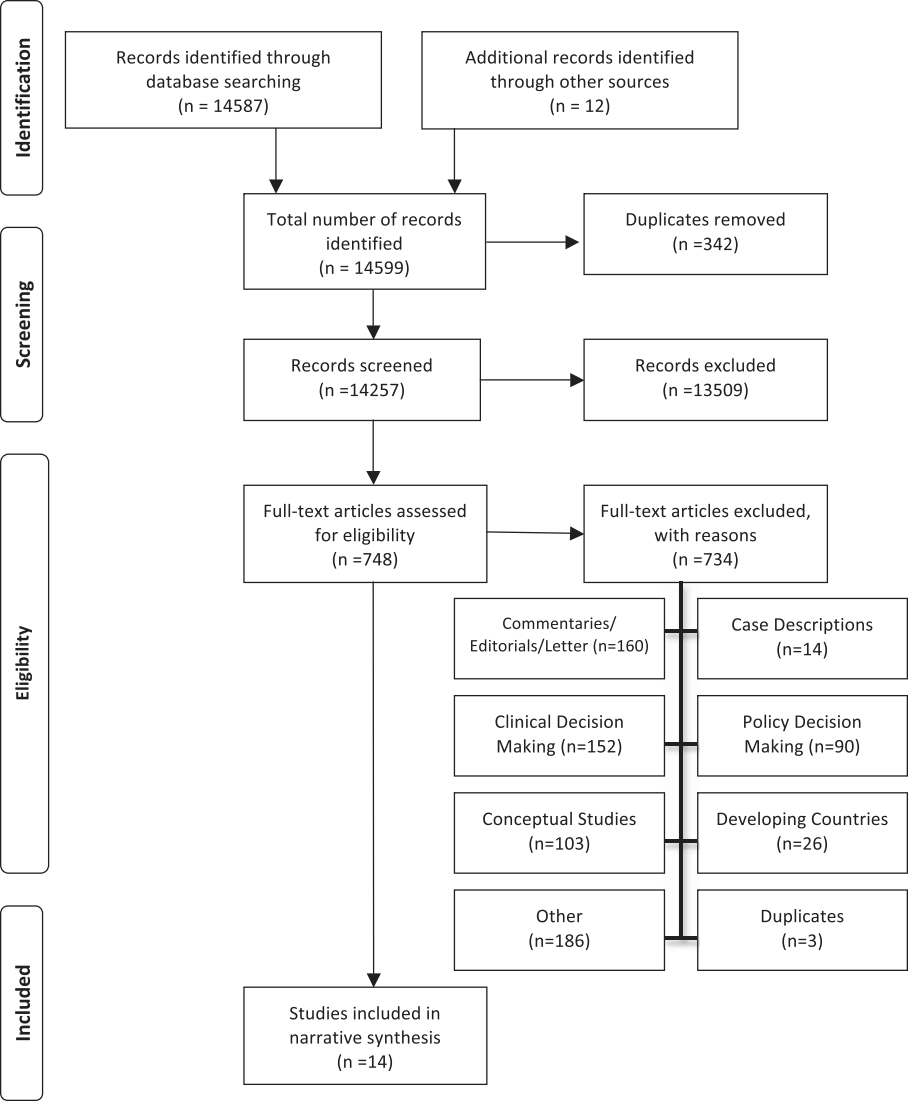

Supplement: MOESM2 [file 9532410]
